# Supplementary material for: A clinical medicine level test at Jinan University School of Medicine reveals the importance of training medical students in clinical history-taking
Source: PeerJ. 2023 Mar 27;11:e15052. doi: 10.7717/peerj.15052 (PMC10062337; doi:10.7717/peerj.15052)
Supplement: Data S1 [file peerj-11-15052-s003.xls]

## Sheet: original scores at each station
S1	S2	S3	S4	S5	S6				Z1	Z2	Z3	Z4	Z5	Z6	T1	T2	T3	T4	T5	T6
87	80	94	93	94	92		85.3165	11.0088	0.152926	-0.48293	0.788783	0.697946	0.788783	0.60711	51.5293	45.1707	57.8878	56.9795	57.8878	56.0711
82	85	90	95	95	98		85.3165	11.0088	-0.301257	-0.0287469	0.425436	0.87962	0.87962	1.15213	46.9874	49.7125	54.2544	58.7962	58.7962	61.5213
86	88	93	96	96	94		85.3165	11.0088	0.0620898	0.243763	0.697946	0.970456	0.970456	0.788783	50.6209	52.4376	56.9795	59.7046	59.7046	57.8878
82	82	90	89	92	90		85.3165	11.0088	-0.301257	-0.301257	0.425436	0.3346	0.60711	0.425436	46.9874	46.9874	54.2544	53.346	56.0711	54.2544
89	78	92	95	91	96		85.3165	11.0088	0.3346	-0.664604	0.60711	0.87962	0.516273	0.970456	53.346	43.354	56.0711	58.7962	55.1627	59.7046
91	80	78	96	95	90		85.3165	11.0088	0.516273	-0.48293	-0.664604	0.970456	0.87962	0.425436	55.1627	45.1707	43.354	59.7046	58.7962	54.2544
89	83	95	97	81	88		85.3165	11.0088	0.3346	-0.21042	0.87962	1.06129	-0.392094	0.243763	53.346	47.8958	58.7962	60.6129	46.0791	52.4376
92	76.5	76	98	84	80		85.3165	11.0088	0.60711	-0.800859	-0.846277	1.15213	-0.119584	-0.48293	56.0711	41.9914	41.5372	61.5213	48.8042	45.1707
91.5	79	90	94	93	92		85.3165	11.0088	0.561691	-0.573767	0.425436	0.788783	0.697946	0.60711	55.6169	44.2623	54.2544	57.8878	56.9795	56.0711
94.5	79.5	90	92	94	85		85.3165	11.0088	0.834201	-0.528349	0.425436	0.60711	0.788783	-0.0287469	58.342	44.7165	54.2544	56.0711	57.8878	49.7125
95	83.5	97	98	92	90		85.3165	11.0088	0.87962	-0.165002	1.06129	1.15213	0.60711	0.425436	58.7962	48.35	60.6129	61.5213	56.0711	54.2544
92	89.5	89	93	95	97		85.3165	11.0088	0.60711	0.380018	0.3346	0.697946	0.87962	1.06129	56.0711	53.8002	53.346	56.9795	58.7962	60.6129
75	71	77	89	90	98		85.3165	11.0088	-0.937114	-1.30046	-0.75544	0.3346	0.425436	1.15213	40.6289	36.9954	42.4456	53.346	54.2544	61.5213
64	76	86	88	92	91		85.3165	11.0088	-1.93632	-0.846277	0.0620898	0.243763	0.60711	0.516273	30.6368	41.5372	50.6209	52.4376	56.0711	55.1627
78	84	77	91	95	90		85.3165	11.0088	-0.664604	-0.119584	-0.75544	0.516273	0.87962	0.425436	43.354	48.8042	42.4456	55.1627	58.7962	54.2544
86	73	92	92	92	94		85.3165	11.0088	0.0620898	-1.11879	0.60711	0.60711	0.60711	0.788783	50.6209	38.8121	56.0711	56.0711	56.0711	57.8878
71	63	55	88	90	94		85.3165	11.0088	-1.30046	-2.02715	-2.75385	0.243763	0.425436	0.788783	36.9954	29.7285	22.4615	52.4376	54.2544	57.8878
84	73	89	95	96	90		85.3165	11.0088	-0.119584	-1.11879	0.3346	0.87962	0.970456	0.425436	48.8042	38.8121	53.346	58.7962	59.7046	54.2544
96	90	94	98	98	95		85.3165	11.0088	0.970456	0.425436	0.788783	1.15213	1.15213	0.87962	59.7046	54.2544	57.8878	61.5213	61.5213	58.7962
91.5	92.5	93	97	95	99		85.3165	11.0088	0.561691	0.652528	0.697946	1.06129	0.87962	1.24297	55.6169	56.5253	56.9795	60.6129	58.7962	62.4297
92	88.5	74	98	89	79		85.3165	11.0088	0.60711	0.289181	-1.02795	1.15213	0.3346	-0.573767	56.0711	52.8918	39.7205	61.5213	53.346	44.2623
95	80.5	93	94	89	93		85.3165	11.0088	0.87962	-0.437512	0.697946	0.788783	0.3346	0.697946	58.7962	45.6249	56.9795	57.8878	53.346	56.9795
93.5	86	80	99	92	80		85.3165	11.0088	0.743365	0.0620898	-0.48293	1.24297	0.60711	-0.48293	57.4336	50.6209	45.1707	62.4297	56.0711	45.1707
94	78.5	94	99	98	87		85.3165	11.0088	0.788783	-0.619185	0.788783	1.24297	1.15213	0.152926	57.8878	43.8081	57.8878	62.4297	61.5213	51.5293
70	87	93	94	94	91		85.3165	11.0088	-1.3913	0.152926	0.697946	0.788783	0.788783	0.516273	36.087	51.5293	56.9795	57.8878	57.8878	55.1627
94	88	88	98	93	90		85.3165	11.0088	0.788783	0.243763	0.243763	1.15213	0.697946	0.425436	57.8878	52.4376	52.4376	61.5213	56.9795	54.2544
89	77	84	99	96	95		85.3165	11.0088	0.3346	-0.75544	-0.119584	1.24297	0.970456	0.87962	53.346	42.4456	48.8042	62.4297	59.7046	58.7962
98	69	98	99	95	90		85.3165	11.0088	1.15213	-1.48213	1.15213	1.24297	0.87962	0.425436	61.5213	35.1787	61.5213	62.4297	58.7962	54.2544
81	78	94	96	95	100		85.3165	11.0088	-0.392094	-0.664604	0.788783	0.970456	0.87962	1.3338	46.0791	43.354	57.8878	59.7046	58.7962	63.338
85	76	91	99	97	100		85.3165	11.0088	-0.0287469	-0.846277	0.516273	1.24297	1.06129	1.3338	49.7125	41.5372	55.1627	62.4297	60.6129	63.338
94	87.5	84	97	93	98		85.3165	11.0088	0.788783	0.198345	-0.119584	1.06129	0.697946	1.15213	57.8878	51.9834	48.8042	60.6129	56.9795	61.5213
91.5	81.5	93	91	88	87		85.3165	11.0088	0.561691	-0.346675	0.697946	0.516273	0.243763	0.152926	55.6169	46.5332	56.9795	55.1627	52.4376	51.5293
92.5	90.5	85	95	90	80		85.3165	11.0088	0.652528	0.470855	-0.0287469	0.87962	0.425436	-0.48293	56.5253	54.7085	49.7125	58.7962	54.2544	45.1707
92	81.5	94	98	95	90		85.3165	11.0088	0.60711	-0.346675	0.788783	1.15213	0.87962	0.425436	56.0711	46.5332	57.8878	61.5213	58.7962	54.2544
95	85.5	88	91	92	80		85.3165	11.0088	0.87962	0.0166714	0.243763	0.516273	0.60711	-0.48293	58.7962	50.1667	52.4376	55.1627	56.0711	45.1707
96	86	85	94	97	90		85.3165	11.0088	0.970456	0.0620898	-0.0287469	0.788783	1.06129	0.425436	59.7046	50.6209	49.7125	57.8878	60.6129	54.2544
94	85	82	97	98	90		85.3165	11.0088	0.788783	-0.0287469	-0.301257	1.06129	1.15213	0.425436	57.8878	49.7125	46.9874	60.6129	61.5213	54.2544
74	74	84	87	95	72		85.3165	11.0088	-1.02795	-1.02795	-0.119584	0.152926	0.87962	-1.20962	39.7205	39.7205	48.8042	51.5293	58.7962	37.9038
84	82	92	95	98	96		85.3165	11.0088	-0.119584	-0.301257	0.60711	0.87962	1.15213	0.970456	48.8042	46.9874	56.0711	58.7962	61.5213	59.7046
78	78	99	97	96	98		85.3165	11.0088	-0.664604	-0.664604	1.24297	1.06129	0.970456	1.15213	43.354	43.354	62.4297	60.6129	59.7046	61.5213
90	84	88	98	97	93		85.3165	11.0088	0.425436	-0.119584	0.243763	1.15213	1.06129	0.697946	54.2544	48.8042	52.4376	61.5213	60.6129	56.9795
83	82	94	99	90	90		85.3165	11.0088	-0.21042	-0.301257	0.788783	1.24297	0.425436	0.425436	47.8958	46.9874	57.8878	62.4297	54.2544	54.2544
94.5	84.5	85	92	87	89		85.3165	11.0088	0.834201	-0.0741653	-0.0287469	0.60711	0.152926	0.3346	58.342	49.2583	49.7125	56.0711	51.5293	53.346
91	85.5	91	96	94	88		85.3165	11.0088	0.516273	0.0166714	0.516273	0.970456	0.788783	0.243763	55.1627	50.1667	55.1627	59.7046	57.8878	52.4376
93	82.5	97	99	97	80		85.3165	11.0088	0.697946	-0.255839	1.06129	1.24297	1.06129	-0.48293	56.9795	47.4416	60.6129	62.4297	60.6129	45.1707
91	84.5	95	95	90	97		85.3165	11.0088	0.516273	-0.0741653	0.87962	0.87962	0.425436	1.06129	55.1627	49.2583	58.7962	58.7962	54.2544	60.6129
89	77.5	91	97	97	98		85.3165	11.0088	0.3346	-0.710022	0.516273	1.06129	1.06129	1.15213	53.346	42.8998	55.1627	60.6129	60.6129	61.5213
93.5	84.5	81	93	94	92		85.3165	11.0088	0.743365	-0.0741653	-0.392094	0.697946	0.788783	0.60711	57.4336	49.2583	46.0791	56.9795	57.8878	56.0711
75.5	63	80	82	96	90		85.3165	11.0088	-0.891695	-2.02715	-0.48293	-0.301257	0.970456	0.425436	41.083	29.7285	45.1707	46.9874	59.7046	54.2544
76	83	90	94	95	90		85.3165	11.0088	-0.846277	-0.21042	0.425436	0.788783	0.87962	0.425436	41.5372	47.8958	54.2544	57.8878	58.7962	54.2544
74	72	82	70	95	95		85.3165	11.0088	-1.02795	-1.20962	-0.301257	-1.3913	0.87962	0.87962	39.7205	37.9038	46.9874	36.087	58.7962	58.7962
79	66	85	88	97	95		85.3165	11.0088	-0.573767	-1.75464	-0.0287469	0.243763	1.06129	0.87962	44.2623	32.4536	49.7125	52.4376	60.6129	58.7962
75	71.5	92	87	95	92		85.3165	11.0088	-0.937114	-1.25504	0.60711	0.152926	0.87962	0.60711	40.6289	37.4496	56.0711	51.5293	58.7962	56.0711
78.5	81	70	91	92	96		85.3165	11.0088	-0.619185	-0.392094	-1.3913	0.516273	0.60711	0.970456	43.8081	46.0791	36.087	55.1627	56.0711	59.7046
88.5	78.5	93	74	98	80		85.3165	11.0088	0.289181	-0.619185	0.697946	-1.02795	1.15213	-0.48293	52.8918	43.8081	56.9795	39.7205	61.5213	45.1707
87.5	79	85	85	89	90		85.3165	11.0088	0.198345	-0.573767	-0.0287469	-0.0287469	0.3346	0.425436	51.9834	44.2623	49.7125	49.7125	53.346	54.2544
86.5	86	89	93	90	90		85.3165	11.0088	0.107508	0.0620898	0.3346	0.697946	0.425436	0.425436	51.0751	50.6209	53.346	56.9795	54.2544	54.2544
83	81	84	97	96	84		85.3165	11.0088	-0.21042	-0.392094	-0.119584	1.06129	0.970456	-0.119584	47.8958	46.0791	48.8042	60.6129	59.7046	48.8042
81	82	74	83	88	80		85.3165	11.0088	-0.392094	-0.301257	-1.02795	-0.21042	0.243763	-0.48293	46.0791	46.9874	39.7205	47.8958	52.4376	45.1707
88	82.5	63	76	82	70		85.3165	11.0088	0.243763	-0.255839	-2.02715	-0.846277	-0.301257	-1.3913	52.4376	47.4416	29.7285	41.5372	46.9874	36.087
76.5	77.5	92	95	96	92		85.3165	11.0088	-0.800859	-0.710022	0.60711	0.87962	0.970456	0.60711	41.9914	42.8998	56.0711	58.7962	59.7046	56.0711
69.5	64	70	53	93	94		85.3165	11.0088	-1.43672	-1.93632	-1.3913	-2.93552	0.697946	0.788783	35.6328	30.6368	36.087	20.6448	56.9795	57.8878
67.5	75.5	72	87	94	98		85.3165	11.0088	-1.61839	-0.891695	-1.20962	0.152926	0.788783	1.15213	33.8161	41.083	37.9038	51.5293	57.8878	61.5213
74.5	79.5	90	93	96	90		85.3165	11.0088	-0.982532	-0.528349	0.425436	0.697946	0.970456	0.425436	40.1747	44.7165	54.2544	56.9795	59.7046	54.2544
76	60.5	89	90	97	90		85.3165	11.0088	-0.846277	-2.25425	0.3346	0.425436	1.06129	0.425436	41.5372	27.4575	53.346	54.2544	60.6129	54.2544
72.5	62.5	76	90	90	95		85.3165	11.0088	-1.16421	-2.07257	-0.846277	0.425436	0.425436	0.87962	38.3579	29.2743	41.5372	54.2544	54.2544	58.7962
85	79.5	65	94	96	91		85.3165	11.0088	-0.0287469	-0.528349	-1.84548	0.788783	0.970456	0.516273	49.7125	44.7165	31.5452	57.8878	59.7046	55.1627
89	89.5	96	93	95	93		85.3165	11.0088	0.3346	0.380018	0.970456	0.697946	0.87962	0.697946	53.346	53.8002	59.7046	56.9795	58.7962	56.9795
91	84	87	87	86	86		85.3165	11.0088	0.516273	-0.119584	0.152926	0.152926	0.0620898	0.0620898	55.1627	48.8042	51.5293	51.5293	50.6209	50.6209
80.5	77	76	88	87	89		85.3165	11.0088	-0.437512	-0.75544	-0.846277	0.243763	0.152926	0.3346	45.6249	42.4456	41.5372	52.4376	51.5293	53.346
85	82	83	94	97	93		85.3165	11.0088	-0.0287469	-0.301257	-0.21042	0.788783	1.06129	0.697946	49.7125	46.9874	47.8958	57.8878	60.6129	56.9795
75	74	60	85	95	91		85.3165	11.0088	-0.937114	-1.02795	-2.29966	-0.0287469	0.87962	0.516273	40.6289	39.7205	27.0034	49.7125	58.7962	55.1627
76.5	68	89	92	95	95		85.3165	11.0088	-0.800859	-1.57297	0.3346	0.60711	0.87962	0.87962	41.9914	34.2703	53.346	56.0711	58.7962	58.7962
78	65.5	82	88	93	89		85.3165	11.0088	-0.664604	-1.80006	-0.301257	0.243763	0.697946	0.3346	43.354	31.9994	46.9874	52.4376	56.9795	53.346
74	62	68	81	96	94		85.3165	11.0088	-1.02795	-2.11799	-1.57297	-0.392094	0.970456	0.788783	39.7205	28.8201	34.2703	46.0791	59.7046	57.8878
73.5	60.5	89	80	96	97		85.3165	11.0088	-1.07337	-2.25425	0.3346	-0.48293	0.970456	1.06129	39.2663	27.4575	53.346	45.1707	59.7046	60.6129
71.5	59	72	70	94	94		85.3165	11.0088	-1.25504	-2.3905	-1.20962	-1.3913	0.788783	0.788783	37.4496	26.095	37.9038	36.087	57.8878	57.8878
87	83	66	90	94	92		85.3165	11.0088	0.152926	-0.21042	-1.75464	0.425436	0.788783	0.60711	51.5293	47.8958	32.4536	54.2544	57.8878	56.0711
84	87.5	94	96	87	92		85.3165	11.0088	-0.119584	0.198345	0.788783	0.970456	0.152926	0.60711	48.8042	51.9834	57.8878	59.7046	51.5293	56.0711
82.5	79	83	76	93	92		85.3165	11.0088	-0.255839	-0.573767	-0.21042	-0.846277	0.697946	0.60711	47.4416	44.2623	47.8958	41.5372	56.9795	56.0711
88.5	89	92	96	98	90		85.3165	11.0088	0.289181	0.3346	0.60711	0.970456	1.15213	0.425436	52.8918	53.346	56.0711	59.7046	61.5213	54.2544
78.5	76	66	70	93	92		85.3165	11.0088	-0.619185	-0.846277	-1.75464	-1.3913	0.697946	0.60711	43.8081	41.5372	32.4536	36.087	56.9795	56.0711
84.5	81	97	81	97	92		85.3165	11.0088	-0.0741653	-0.392094	1.06129	-0.392094	1.06129	0.60711	49.2583	46.0791	60.6129	46.0791	60.6129	56.0711
85.5	80.5	91	89	94	97		85.3165	11.0088	0.0166714	-0.437512	0.516273	0.3346	0.788783	1.06129	50.1667	45.6249	55.1627	53.346	57.8878	60.6129
69	59	86	94	96	97		85.3165	11.0088	-1.48213	-2.3905	0.0620898	0.788783	0.970456	1.06129	35.1787	26.095	50.6209	57.8878	59.7046	60.6129
67.5	62	65	87	95	90		85.3165	11.0088	-1.61839	-2.11799	-1.84548	0.152926	0.87962	0.425436	33.8161	28.8201	31.5452	51.5293	58.7962	54.2544
82	77	90	93	96	98		85.3165	11.0088	-0.301257	-0.75544	0.425436	0.697946	0.970456	1.15213	46.9874	42.4456	54.2544	56.9795	59.7046	61.5213
75.5	61.5	92	88	95	90		85.3165	11.0088	-0.891695	-2.16341	0.60711	0.243763	0.87962	0.425436	41.083	28.3659	56.0711	52.4376	58.7962	54.2544
75.5	85.5	89	93	97	98		85.3165	11.0088	-0.891695	0.0166714	0.3346	0.697946	1.06129	1.15213	41.083	50.1667	53.346	56.9795	60.6129	61.5213
85	88	75	85	94	95		85.3165	11.0088	-0.0287469	0.243763	-0.937114	-0.0287469	0.788783	0.87962	49.7125	52.4376	40.6289	49.7125	57.8878	58.7962
81	75	49	50	78	90		85.3165	11.0088	-0.392094	-0.937114	-3.29887	-3.20803	-0.664604	0.425436	46.0791	40.6289	17.0113	17.9197	43.354	54.2544
89	75	76	79	91	85		85.3165	11.0088	0.3346	-0.937114	-0.846277	-0.573767	0.516273	-0.0287469	53.346	40.6289	41.5372	44.2623	55.1627	49.7125
85	72.5	44	80	76	82		85.3165	11.0088	-0.0287469	-1.16421	-3.75305	-0.48293	-0.846277	-0.301257	49.7125	38.3579	12.4695	45.1707	41.5372	46.9874
85	76.5	57	72	92	82		85.3165	11.0088	-0.0287469	-0.800859	-2.57217	-1.20962	0.60711	-0.301257	49.7125	41.9914	24.2783	37.9038	56.0711	46.9874
82	65	36	60	91	82		85.3165	11.0088	-0.301257	-1.84548	-4.47974	-2.29966	0.516273	-0.301257	46.9874	31.5452	5.20256	27.0034	55.1627	46.9874
86.5	82	87	95	97	97		85.3165	11.0088	0.107508	-0.301257	0.152926	0.87962	1.06129	1.06129	51.0751	46.9874	51.5293	58.7962	60.6129	60.6129
88	89.5	84	85	98	96		85.3165	11.0088	0.243763	0.380018	-0.119584	-0.0287469	1.15213	0.970456	52.4376	53.8002	48.8042	49.7125	61.5213	59.7046
72.5	74	81	85	94	97		85.3165	11.0088	-1.16421	-1.02795	-0.392094	-0.0287469	0.788783	1.06129	38.3579	39.7205	46.0791	49.7125	57.8878	60.6129
86	87	73	91	98	98		85.3165	11.0088	0.0620898	0.152926	-1.11879	0.516273	1.15213	1.15213	50.6209	51.5293	38.8121	55.1627	61.5213	61.5213
61	60.5	50	84	94	95		85.3165	11.0088	-2.20883	-2.25425	-3.20803	-0.119584	0.788783	0.87962	27.9117	27.4575	17.9197	48.8042	57.8878	58.7962
70.5	77.5	77	93	96	100		85.3165	11.0088	-1.34588	-0.710022	-0.75544	0.697946	0.970456	1.3338	36.5412	42.8998	42.4456	56.9795	59.7046	63.338
88	79.5	56	74	95	96		85.3165	11.0088	0.243763	-0.528349	-2.66301	-1.02795	0.87962	0.970456	52.4376	44.7165	23.3699	39.7205	58.7962	59.7046
80	72.5	60	82	98	81		85.3165	11.0088	-0.48293	-1.16421	-2.29966	-0.301257	1.15213	-0.392094	45.1707	38.3579	27.0034	46.9874	61.5213	46.0791
86	78	69	95	93	72		85.3165	11.0088	0.0620898	-0.664604	-1.48213	0.87962	0.697946	-1.20962	50.6209	43.354	35.1787	58.7962	56.9795	37.9038
71	70.5	68	84	85	75		85.3165	11.0088	-1.30046	-1.34588	-1.57297	-0.119584	-0.0287469	-0.937114	36.9954	36.5412	34.2703	48.8042	49.7125	40.6289
87	88	73	95	92	95		85.3165	11.0088	0.152926	0.243763	-1.11879	0.87962	0.60711	0.87962	51.5293	52.4376	38.8121	58.7962	56.0711	58.7962
75.5	68.5	52	88	94	79		85.3165	11.0088	-0.891695	-1.52755	-3.02636	0.243763	0.788783	-0.573767	41.083	34.7245	19.7364	52.4376	57.8878	44.2623
86.5	83	97	95	95	97		85.3165	11.0088	0.107508	-0.21042	1.06129	0.87962	0.87962	1.06129	51.0751	47.8958	60.6129	58.7962	58.7962	60.6129
86	81	87	98	99	100		85.3165	11.0088	0.0620898	-0.392094	0.152926	1.15213	1.24297	1.3338	50.6209	46.0791	51.5293	61.5213	62.4297	63.338
68	44	59	87	94	94		85.3165	11.0088	-1.57297	-3.75305	-2.3905	0.152926	0.788783	0.788783	34.2703	12.4695	26.095	51.5293	57.8878	57.8878
85	87	84	94	95	100		85.3165	11.0088	-0.0287469	0.152926	-0.119584	0.788783	0.87962	1.3338	49.7125	51.5293	48.8042	57.8878	58.7962	63.338
72	60	65	70	90	96		85.3165	11.0088	-1.20962	-2.29966	-1.84548	-1.3913	0.425436	0.970456	37.9038	27.0034	31.5452	36.087	54.2544	59.7046
74	68	79	97	75	81		85.3165	11.0088	-1.02795	-1.57297	-0.573767	1.06129	-0.937114	-0.392094	39.7205	34.2703	44.2623	60.6129	40.6289	46.0791
80	79	67	78	95	82		85.3165	11.0088	-0.48293	-0.573767	-1.66381	-0.664604	0.87962	-0.301257	45.1707	44.2623	33.3619	43.354	58.7962	46.9874
72	58	11	60	74	75		85.3165	11.0088	-1.20962	-2.48134	-6.75066	-2.29966	-1.02795	-0.937114	37.9038	25.1866	-17.5066	27.0034	39.7205	40.6289
80	71.5	50	88	92	97		85.3165	11.0088	-0.48293	-1.25504	-3.20803	0.243763	0.60711	1.06129	45.1707	37.4496	17.9197	52.4376	56.0711	60.6129
73	82	82	90	97	91		85.3165	11.0088	-1.11879	-0.301257	-0.301257	0.425436	1.06129	0.516273	38.8121	46.9874	46.9874	54.2544	60.6129	55.1627
90	87	88	87	96	96		85.3165	11.0088	0.425436	0.152926	0.243763	0.152926	0.970456	0.970456	54.2544	51.5293	52.4376	51.5293	59.7046	59.7046
77	79	93	92	94	95		85.3165	11.0088	-0.75544	-0.573767	0.697946	0.60711	0.788783	0.87962	42.4456	44.2623	56.9795	56.0711	57.8878	58.7962
88	74	91	87	96	100		85.3165	11.0088	0.243763	-1.02795	0.516273	0.152926	0.970456	1.3338	52.4376	39.7205	55.1627	51.5293	59.7046	63.338
73.5	83	93	97	96	96		85.3165	11.0088	-1.07337	-0.21042	0.697946	1.06129	0.970456	0.970456	39.2663	47.8958	56.9795	60.6129	59.7046	59.7046
84	80	74	90	97	97		85.3165	11.0088	-0.119584	-0.48293	-1.02795	0.425436	1.06129	1.06129	48.8042	45.1707	39.7205	54.2544	60.6129	60.6129
66	72	95	94	95	98		85.3165	11.0088	-1.75464	-1.20962	0.87962	0.788783	0.87962	1.15213	32.4536	37.9038	58.7962	57.8878	58.7962	61.5213
84	77.5	74	89	91	85		85.3165	11.0088	-0.119584	-0.710022	-1.02795	0.3346	0.516273	-0.0287469	48.8042	42.8998	39.7205	53.346	55.1627	49.7125
90	88.5	90	94	95	87		85.3165	11.0088	0.425436	0.289181	0.425436	0.788783	0.87962	0.152926	54.2544	52.8918	54.2544	57.8878	58.7962	51.5293
88	85.5	85	93	95	97		85.3165	11.0088	0.243763	0.0166714	-0.0287469	0.697946	0.87962	1.06129	52.4376	50.1667	49.7125	56.9795	58.7962	60.6129
84	80.5	73	91	98	89		85.3165	11.0088	-0.119584	-0.437512	-1.11879	0.516273	1.15213	0.3346	48.8042	45.6249	38.8121	55.1627	61.5213	53.346
77	85	64	82	92	85		85.3165	11.0088	-0.75544	-0.0287469	-1.93632	-0.301257	0.60711	-0.0287469	42.4456	49.7125	30.6368	46.9874	56.0711	49.7125
91	88.5	84	90	95	93		85.3165	11.0088	0.516273	0.289181	-0.119584	0.425436	0.87962	0.697946	55.1627	52.8918	48.8042	54.2544	58.7962	56.9795
88.5	83.5	67	88	97	94		85.3165	11.0088	0.289181	-0.165002	-1.66381	0.243763	1.06129	0.788783	52.8918	48.35	33.3619	52.4376	60.6129	57.8878
90	93	89	93	96	95		85.3165	11.0088	0.425436	0.697946	0.3346	0.697946	0.970456	0.87962	54.2544	56.9795	53.346	56.9795	59.7046	58.7962
87	87	97	91	97	95		85.3165	11.0088	0.152926	0.152926	1.06129	0.516273	1.06129	0.87962	51.5293	51.5293	60.6129	55.1627	60.6129	58.7962
87.5	81	86	93	97	93		85.3165	11.0088	0.198345	-0.392094	0.0620898	0.697946	1.06129	0.697946	51.9834	46.0791	50.6209	56.9795	60.6129	56.9795
89.5	83.5	79	92	97	90		85.3165	11.0088	0.380018	-0.165002	-0.573767	0.60711	1.06129	0.425436	53.8002	48.35	44.2623	56.0711	60.6129	54.2544
85	81	68	88	98	94		85.3165	11.0088	-0.0287469	-0.392094	-1.57297	0.243763	1.15213	0.788783	49.7125	46.0791	34.2703	52.4376	61.5213	57.8878
84	76.5	66	98	99	87		85.3165	11.0088	-0.119584	-0.800859	-1.75464	1.15213	1.24297	0.152926	48.8042	41.9914	32.4536	61.5213	62.4297	51.5293
78.5	67	56	92	94	73		85.3165	11.0088	-0.619185	-1.66381	-2.66301	0.60711	0.788783	-1.11879	43.8081	33.3619	23.3699	56.0711	57.8878	38.8121
94	78.5	72	93	99	97		85.3165	11.0088	0.788783	-0.619185	-1.20962	0.697946	1.24297	1.06129	57.8878	43.8081	37.9038	56.9795	62.4297	60.6129
87	84.5	69	78	91	91		85.3165	11.0088	0.152926	-0.0741653	-1.48213	-0.664604	0.516273	0.516273	51.5293	49.2583	35.1787	43.354	55.1627	55.1627
87	82.5	84	87	96	94		85.3165	11.0088	0.152926	-0.255839	-0.119584	0.152926	0.970456	0.788783	51.5293	47.4416	48.8042	51.5293	59.7046	57.8878
73	81.5	86	78	98	95		85.3165	11.0088	-1.11879	-0.346675	0.0620898	-0.664604	1.15213	0.87962	38.8121	46.5332	50.6209	43.354	61.5213	58.7962
82.5	86	90	86	90	83		85.3165	11.0088	-0.255839	0.0620898	0.425436	0.0620898	0.425436	-0.21042	47.4416	50.6209	54.2544	50.6209	54.2544	47.8958
70.5	74.5	85	90	90	92		85.3165	11.0088	-1.34588	-0.982532	-0.0287469	0.425436	0.425436	0.60711	36.5412	40.1747	49.7125	54.2544	54.2544	56.0711
76	81	71	83	92	81		85.3165	11.0088	-0.846277	-0.392094	-1.30046	-0.21042	0.60711	-0.392094	41.5372	46.0791	36.9954	47.8958	56.0711	46.0791
70	87.5	89	86	95	94		85.3165	11.0088	-1.3913	0.198345	0.3346	0.0620898	0.87962	0.788783	36.087	51.9834	53.346	50.6209	58.7962	57.8878
81	83.5	85	84	99	79		85.3165	11.0088	-0.392094	-0.165002	-0.0287469	-0.119584	1.24297	-0.573767	46.0791	48.35	49.7125	48.8042	62.4297	44.2623
81.5	84	80	85	97	84		85.3165	11.0088	-0.346675	-0.119584	-0.48293	-0.0287469	1.06129	-0.119584	46.5332	48.8042	45.1707	49.7125	60.6129	48.8042
85	76.5	85	98	95	97		85.3165	11.0088	-0.0287469	-0.800859	-0.0287469	1.15213	0.87962	1.06129	49.7125	41.9914	49.7125	61.5213	58.7962	60.6129
89.5	89.5	71	91	93	96		85.3165	11.0088	0.380018	0.380018	-1.30046	0.516273	0.697946	0.970456	53.8002	53.8002	36.9954	55.1627	56.9795	59.7046
80	75.5	82	70	92	95		85.3165	11.0088	-0.48293	-0.891695	-0.301257	-1.3913	0.60711	0.87962	45.1707	41.083	46.9874	36.087	56.0711	58.7962
79	77.5	65	76	93	80		85.3165	11.0088	-0.573767	-0.710022	-1.84548	-0.846277	0.697946	-0.48293	44.2623	42.8998	31.5452	41.5372	56.9795	45.1707
77	52.5	27	57	92	90		85.3165	11.0088	-0.75544	-2.98094	-5.29727	-2.57217	0.60711	0.425436	42.4456	20.1906	-2.97274	24.2783	56.0711	54.2544
66.5	69	77	79	90	95		85.3165	11.0088	-1.70923	-1.48213	-0.75544	-0.573767	0.425436	0.87962	32.9077	35.1787	42.4456	44.2623	54.2544	58.7962
56	61	57	61	88	81		85.3165	11.0088	-2.66301	-2.20883	-2.57217	-2.20883	0.243763	-0.392094	23.3699	27.9117	24.2783	27.9117	52.4376	46.0791
78	73	78	81	96	93		85.3165	11.0088	-0.664604	-1.11879	-0.664604	-0.392094	0.970456	0.697946	43.354	38.8121	43.354	46.0791	59.7046	56.9795
77.5	79.5	84	90	98	90		85.3165	11.0088	-0.710022	-0.528349	-0.119584	0.425436	1.15213	0.425436	42.8998	44.7165	48.8042	54.2544	61.5213	54.2544
80	79	86	82	96	84		85.3165	11.0088	-0.48293	-0.573767	0.0620898	-0.301257	0.970456	-0.119584	45.1707	44.2623	50.6209	46.9874	59.7046	48.8042
86	89	93	87	97	95		85.3165	11.0088	0.0620898	0.3346	0.697946	0.152926	1.06129	0.87962	50.6209	53.346	56.9795	51.5293	60.6129	58.7962
77.5	81	84	82	91	89		85.3165	11.0088	-0.710022	-0.392094	-0.119584	-0.301257	0.516273	0.3346	42.8998	46.0791	48.8042	46.9874	55.1627	53.346
76	87.5	97	93	95	95		85.3165	11.0088	-0.846277	0.198345	1.06129	0.697946	0.87962	0.87962	41.5372	51.9834	60.6129	56.9795	58.7962	58.7962
83.5	83.5	66	92	98	93		85.3165	11.0088	-0.165002	-0.165002	-1.75464	0.60711	1.15213	0.697946	48.35	48.35	32.4536	56.0711	61.5213	56.9795
81.5	67	72	71	94	87		85.3165	11.0088	-0.346675	-1.66381	-1.20962	-1.30046	0.788783	0.152926	46.5332	33.3619	37.9038	36.9954	57.8878	51.5293
80.5	83	77	83	91	87		85.3165	11.0088	-0.437512	-0.21042	-0.75544	-0.21042	0.516273	0.152926	45.6249	47.8958	42.4456	47.8958	55.1627	51.5293
81.5	84.5	82	94	95	94		85.3165	11.0088	-0.346675	-0.0741653	-0.301257	0.788783	0.87962	0.788783	46.5332	49.2583	46.9874	57.8878	58.7962	57.8878
71	84	73	61	91	78		85.3165	11.0088	-1.30046	-0.119584	-1.11879	-2.20883	0.516273	-0.664604	36.9954	48.8042	38.8121	27.9117	55.1627	43.354
78	88	72	94	94	91		85.3165	11.0088	-0.664604	0.243763	-1.20962	0.788783	0.788783	0.516273	43.354	52.4376	37.9038	57.8878	57.8878	55.1627
64	76.5	30	51	51	37		85.3165	11.0088	-1.93632	-0.800859	-5.02476	-3.11719	-3.11719	-4.38891	30.6368	41.9914	-0.24764	18.8281	18.8281	6.11093
77	75.5	79	85	97	93		85.3165	11.0088	-0.75544	-0.891695	-0.573767	-0.0287469	1.06129	0.697946	42.4456	41.083	44.2623	49.7125	60.6129	56.9795

## Sheet: T score of subjects
		emergency	nursing	surgical
59.7046	57.8878	58.7962	61.5213	56.0711
56.0711	54.2544	55.1627	60.6129	54.2544
54.2544	57.8878	56.0711	56.9795	59.7046
59.7046	54.2544	56.9795	61.5213	54.2544
53.346	44.2623	48.8042	37.9038	52.4376
56.0711	45.1707	50.6209	56.0711	45.1707
56.0711	59.7046	57.8878	58.7962	56.0711
53.346	54.2544	53.8002	56.9795	49.7125
52.4376	45.1707	48.8042	53.346	61.5213
56.9795	57.8878	57.4336	60.6129	55.1627
60.6129	56.0711	58.342	56.0711	54.2544
55.1627	49.7125	52.4376	60.6129	57.8878
58.7962	46.9874	52.8918	59.7046	58.7962
39.7205	40.6289	40.1747	58.7962	62.4297
59.7046	63.338	61.5213	60.6129	45.1707
61.5213	53.346	57.4336	58.7962	51.5293
60.6129	57.8878	59.2504	55.1627	55.1627
57.8878	38.8121	48.35	59.7046	54.2544
54.2544	56.0711	55.1627	58.7962	58.7962
59.7046	48.8042	54.2544	53.346	54.2544
58.7962	58.7962	58.7962	56.9795	63.338
55.1627	43.354	49.2583		63.338
		56.0711		51.5293
		61.5213		45.1707
		54.2544		54.2544
		59.7046		54.2544
		54.2544		54.2544
		52.4376		59.7046
		45.1707		61.5213
		56.0711		56.9795
		49.7125		54.2544
		60.6129		53.346
		61.5213		52.4376
		55.1627		45.1707
		54.2544		60.6129
		57.8878		61.5213
		58.7962		54.2544
		62.4297		54.2544
		56.9795		58.7962
		45.1707		56.0711
		51.5293		45.1707
		55.1627		54.2544
		54.2544		48.8042
		58.7962		36.087
		54.2544		56.0711
		63.338		61.5213
		63.338		54.2544
		61.5213		54.2544
		51.5293		58.7962
		45.1707		55.1627
		54.2544		50.6209
		54.2544		56.9795
		54.2544		55.1627
		37.9038		58.7962
		59.7046		53.346
		61.5213		57.8878
		56.9795		57.8878
		54.2544		56.0711
		53.346		56.0711
		52.4376		56.0711
		45.1707		54.2544
		60.6129		60.6129
		61.5213		54.2544
		56.0711		61.5213
		54.2544		54.2544
		54.2544		61.5213
		58.7962		58.7962
		58.7962		54.2544
		56.0711		46.9874
		45.1707		46.9874
		54.2544		46.9874
		48.8042		60.6129
		36.087		60.6129
		56.0711		61.5213
		61.5213		58.7962
		54.2544		63.338
		54.2544		59.7046
		58.7962		46.0791
		55.1627		37.9038
		56.9795		40.6289
		50.6209		58.7962
		53.346		44.2623
		56.9795		60.6129
		55.1627		63.338
		58.7962		57.8878
		53.346		63.338
		57.8878		59.7046
		60.6129		46.0791
		57.8878		60.6129
		56.0711		55.1627
		56.0711		59.7046
		56.0711		59.7046
		54.2544		60.6129
		56.0711		61.5213
		60.6129		49.7125
		60.6129		51.5293
		54.2544		49.7125
		61.5213		56.9795
		54.2544		58.7962
		61.5213		56.9795
		58.7962		54.2544
		54.2544		57.8878
		46.9874		51.5293
		46.9874		60.6129
		46.9874		57.8878
		60.6129		58.7962
		59.7046		47.8958
		60.6129		46.0791
		61.5213		57.8878
		58.7962		44.2623
		63.338		48.8042
		59.7046		60.6129
		46.0791		58.7962
		37.9038		45.1707
		40.6289		54.2544
		58.7962		58.7962
		44.2623		46.0791
		60.6129		56.9795
		63.338		54.2544
		57.8878		56.9795
		63.338		51.5293
		59.7046		51.5293
		46.0791		57.8878
		60.6129		55.1627
		55.1627		6.11093
		59.7046
		58.7962
		59.7046
		60.6129
		61.5213
		49.7125
		51.5293
		60.6129
		49.7125
		56.9795
		58.7962
		58.7962
		56.9795
		54.2544
		57.8878
		51.5293
		60.6129
		55.1627
		57.8878
		58.7962
		47.8958
		46.0791
		57.8878
		44.2623
		48.8042
		60.6129
		59.7046
		58.7962
		45.1707
		54.2544
		58.7962
		46.0791
		56.9795
		54.2544
		58.7962
		53.346
		56.9795
		51.5293
		51.5293
		57.8878
		55.1627
		6.11093
		56.9795

## Sheet: T scroe of emergency
t5	t6	T
59.7046	57.8878	58.7962
56.0711	54.2544	55.1627
54.2544	57.8878	56.0711
59.7046	54.2544	56.9795
53.346	44.2623	48.8042
56.0711	45.1707	50.6209
56.0711	59.7046	57.8878
53.346	54.2544	53.8002
52.4376	45.1707	48.8042
56.9795	57.8878	57.4336
60.6129	56.0711	58.342
55.1627	49.7125	52.4376
58.7962	46.9874	52.8918
39.7205	40.6289	40.1747
59.7046	63.338	61.5213
61.5213	53.346	57.4336
60.6129	57.8878	59.2504
57.8878	38.8121	48.35
54.2544	56.0711	55.1627
59.7046	48.8042	54.2544
58.7962	58.7962	58.7962
55.1627	43.354	49.2583

## Sheet: scores of each iterms
t3	t4	C1		t3	t4	C2		t3	t4	C3		t3	t4	D1		t3	t4	D2		t3	t4	D3		t3	t4	D4
54.2544	53.346	53.8002		43.354	59.7046	51.5293		57.8878	56.9795	57.4336		57.8878	56.9795	57.4336		56.9795	59.7046	58.342		54.2544	53.346	53.8002		43.354	59.7046	51.5293
58.7962	60.6129	59.7046		54.2544	57.8878	56.0711		54.2544	58.7962	56.5253		54.2544	58.7962	56.5253		54.2544	57.8878	56.0711		56.0711	58.7962	57.4336		58.7962	60.6129	59.7046
41.5372	61.5213	51.5293		54.2544	56.0711	55.1627		56.9795	59.7046	58.342		53.346	56.9795	55.1627		60.6129	61.5213	61.0671		41.5372	61.5213	51.5293		50.6209	52.4376	51.5293
60.6129	61.5213	61.0671		42.4456	53.346	47.8958		56.0711	58.7962	57.4336		42.4456	53.346	47.8958		56.0711	56.0711	56.0711		54.2544	56.0711	55.1627		42.4456	55.1627	48.8042
53.346	56.9795	55.1627		42.4456	55.1627	48.8042		50.6209	52.4376	51.5293		57.8878	61.5213	59.7046		22.4615	52.4376	37.4496		45.1707	62.4297	53.8002		48.8042	62.4297	55.6169
56.0711	56.0711	56.0711		22.4615	52.4376	37.4496		53.346	58.7962	56.0711		56.9795	60.6129	58.7962		53.346	58.7962	56.0711		57.8878	62.4297	60.1587		55.1627	62.4297	58.7962
57.8878	61.5213	59.7046		56.9795	60.6129	58.7962		56.9795	57.8878	57.4336		56.9795	57.8878	57.4336		39.7205	61.5213	50.6209		52.4376	61.5213	56.9795		57.8878	61.5213	59.7046
39.7205	61.5213	50.6209		56.9795	57.8878	57.4336		61.5213	62.4297	61.9755		57.8878	59.7046	58.7962		56.9795	57.8878	57.4336		61.5213	62.4297	61.9755		49.7125	57.8878	53.8002
55.1627	62.4297	58.7962		45.1707	62.4297	53.8002		57.8878	59.7046	58.7962		48.8042	60.6129	54.7085		56.9795	55.1627	56.0711		52.4376	61.5213	56.9795		46.9874	60.6129	53.8002
56.9795	55.1627	56.0711		57.8878	62.4297	60.1587		57.8878	61.5213	59.7046		48.8042	51.5293	50.1667		49.7125	58.7962	54.2544		57.8878	62.4297	60.1587		56.0711	58.7962	57.4336
48.8042	51.5293	50.1667		52.4376	61.5213	56.9795		49.7125	57.8878	53.8002		58.7962	58.7962	58.7962		52.4376	55.1627	53.8002		60.6129	62.4297	61.5213		49.7125	56.0711	52.8918
52.4376	61.5213	56.9795		48.8042	62.4297	55.6169		56.0711	58.7962	57.4336		46.0791	56.9795	51.5293		62.4297	60.6129	61.5213		55.1627	60.6129	57.8878		55.1627	59.7046	57.4336
49.7125	56.0711	52.8918		48.8042	60.6129	54.7085		62.4297	60.6129	61.5213		46.9874	36.087	41.5372		56.0711	51.5293	53.8002		45.1707	46.9874	46.0791		49.7125	52.4376	51.0751
55.1627	59.7046	57.4336		49.7125	58.7962	54.2544		57.8878	62.4297	60.1587		37.9038	51.5293	44.7165		36.087	55.1627	45.6249		54.2544	57.8878	56.0711		48.8042	60.6129	54.7085
58.7962	58.7962	58.7962		52.4376	55.1627	53.8002		60.6129	62.4297	61.5213		59.7046	56.9795	58.342		56.9795	39.7205	48.35		56.0711	58.7962	57.4336		29.7285	41.5372	35.6328
55.1627	60.6129	57.8878		46.9874	60.6129	53.8002		46.0791	56.9795	51.5293		41.5372	52.4376	46.9874		49.7125	49.7125	49.7125		41.5372	54.2544	47.8958		54.2544	56.9795	55.6169
45.1707	46.9874	46.0791		49.7125	52.4376	51.0751		54.2544	57.8878	56.0711		47.8958	57.8878	52.8918		53.346	56.9795	55.1627		53.346	56.0711	54.7085		31.5452	57.8878	44.7165
56.9795	39.7205	48.35		49.7125	49.7125	49.7125		46.9874	36.087	41.5372		46.9874	52.4376	49.7125		39.7205	47.8958	43.8081		37.9038	36.087	36.9954		51.5293	51.5293	51.5293
53.346	56.9795	55.1627		56.0711	58.7962	57.4336		56.0711	51.5293	53.8002		53.346	45.1707	49.2583		36.087	20.6448	28.3659		57.8878	59.7046	58.7962		27.0034	49.7125	38.3579
48.8042	60.6129	54.7085		36.087	20.6448	28.3659		36.087	55.1627	45.6249		32.4536	36.087	34.2703		53.346	54.2544	53.8002		31.5452	51.5293	41.5372		47.8958	41.5372	44.7165
51.5293	51.5293	51.5293		54.2544	56.9795	55.6169		39.7205	47.8958	43.8081		55.1627	53.346	54.2544		34.2703	46.0791	40.1747		54.2544	56.9795	55.6169		56.0711	59.7046	57.8878
27.0034	49.7125	38.3579		41.5372	54.2544	47.8958		29.7285	41.5372	35.6328		50.6209	57.8878	54.2544		32.4536	54.2544	43.354		53.346	56.9795	55.1627		40.6289	49.7125	45.1707
53.346	56.0711	54.7085		31.5452	57.8878	44.7165		37.9038	51.5293	44.7165		56.0711	52.4376	54.2544		60.6129	46.0791	53.346		5.20256	27.0034	16.103		12.4695	45.1707	28.8201
46.9874	52.4376	49.7125		41.5372	52.4376	46.9874		53.346	54.2544	53.8002		17.0113	17.9197	17.4655		41.5372	44.2623	42.8998		51.5293	58.7962	55.1627		24.2783	37.9038	31.091
57.8878	59.7046	58.7962		47.8958	57.8878	52.8918		59.7046	56.9795	58.342		46.0791	49.7125	47.8958		34.2703	48.8042	41.5372		48.8042	49.7125	49.2583		27.0034	46.9874	36.9954
32.4536	36.087	34.2703		34.2703	46.0791	40.1747		37.9038	36.087	36.9954		38.8121	55.1627	46.9874		38.8121	58.7962	48.8042		17.9197	48.8042	33.3619		35.1787	58.7962	46.9874
60.6129	46.0791	53.346		53.346	45.1707	49.2583		47.8958	41.5372	44.7165		23.3699	39.7205	31.5452		51.5293	61.5213	56.5253		42.4456	56.9795	49.7125		31.5452	36.087	33.8161
55.1627	53.346	54.2544		32.4536	54.2544	43.354		56.0711	59.7046	57.8878		26.095	51.5293	38.8121		33.3619	43.354	38.3579		19.7364	52.4376	36.087		44.2623	60.6129	52.4376
53.346	56.9795	55.1627		50.6209	57.8878	54.2544		31.5452	51.5293	41.5372		17.9197	52.4376	35.1787		-17.5066	27.0034	4.74838		60.6129	58.7962	59.7046		54.2544	57.8878	56.0711
40.6289	49.7125	45.1707		12.4695	45.1707	28.8201		54.2544	56.9795	55.6169		56.9795	56.0711	56.5253		46.9874	54.2544	50.6209		48.8042	57.8878	53.346		30.6368	46.9874	38.8121
17.0113	17.9197	17.4655		5.20256	27.0034	16.103		56.0711	52.4376	54.2544		39.7205	53.346	46.5332		52.4376	51.5293	51.9834		56.9795	60.6129	58.7962		48.8042	54.2544	51.5293
41.5372	44.2623	42.8998		51.5293	58.7962	55.1627		24.2783	37.9038	31.091		49.7125	56.9795	53.346		55.1627	51.5293	53.346		39.7205	54.2544	46.9874		53.346	56.9795	55.1627
38.8121	55.1627	46.9874		46.0791	49.7125	47.8958		48.8042	49.7125	49.2583		60.6129	55.1627	57.8878		38.8121	55.1627	46.9874		58.7962	57.8878	58.342		50.6209	56.9795	53.8002
42.4456	56.9795	49.7125		27.0034	46.9874	36.9954		17.9197	48.8042	33.3619		35.1787	43.354	39.2663		33.3619	52.4376	42.8998		44.2623	56.0711	50.1667		34.2703	52.4376	43.354
23.3699	39.7205	31.5452		35.1787	58.7962	46.9874		51.5293	61.5213	56.5253		50.6209	43.354	46.9874		23.3699	56.0711	39.7205		32.4536	61.5213	46.9874		48.8042	51.5293	50.1667
34.2703	48.8042	41.5372		38.8121	58.7962	48.8042		44.2623	60.6129	52.4376		36.9954	55.1627	46.0791		37.9038	56.9795	47.4416		49.7125	61.5213	55.6169		54.2544	50.6209	52.4376
19.7364	52.4376	36.087		60.6129	58.7962	59.7046		17.9197	52.4376	35.1787		42.4456	44.2623	43.354		49.7125	54.2544	51.9834		46.9874	36.087	41.5372		36.9954	47.8958	42.4456
31.5452	36.087	33.8161		26.095	51.5293	38.8121		46.9874	54.2544	50.6209		56.9795	51.5293	54.2544		31.5452	41.5372	36.5412		-2.97274	24.2783	10.6528		53.346	50.6209	51.9834
33.3619	43.354	38.3579		48.8042	57.8878	53.346		55.1627	51.5293	53.346		48.8042	46.9874	47.8958		24.2783	27.9117	26.095		48.8042	54.2544	51.5293		49.7125	48.8042	49.2583
-17.5066	27.0034	4.74838		38.8121	55.1627	46.9874		56.9795	60.6129	58.7962		37.9038	36.9954	37.4496		50.6209	46.9874	48.8042		32.4536	56.0711	44.2623		45.1707	49.7125	47.4416
52.4376	51.5293	51.9834		50.6209	56.9795	53.8002		39.7205	54.2544	46.9874		44.2623	49.7125	46.9874		60.6129	56.9795	58.7962		42.4456	47.8958	45.1707		43.354	46.0791	44.7165
56.9795	56.0711	56.5253		34.2703	52.4376	43.354		39.7205	53.346	46.5332						46.9874	57.8878	52.4376		37.9038	57.8878	47.8958		-0.24764	18.8281	9.29021
58.7962	57.8878	58.342		32.4536	61.5213	46.9874		54.2544	57.8878	56.0711						38.8121	27.9117	33.3619
53.346	56.9795	55.1627		23.3699	56.0711	39.7205		49.7125	56.9795	53.346
60.6129	55.1627	57.8878		37.9038	56.9795	47.4416		30.6368	46.9874	38.8121
48.8042	51.5293	50.1667		35.1787	43.354	39.2663		48.8042	54.2544	51.5293
54.2544	50.6209	52.4376		50.6209	43.354	46.9874		33.3619	52.4376	42.8998
46.9874	36.087	41.5372		36.9954	47.8958	42.4456		44.2623	56.0711	50.1667
43.354	46.0791	44.7165		49.7125	48.8042	49.2583		49.7125	54.2544	51.9834
50.6209	46.9874	48.8042		49.7125	61.5213	55.6169		53.346	50.6209	51.9834
56.9795	51.5293	54.2544		-2.97274	24.2783	10.6528		45.1707	49.7125	47.4416
60.6129	56.9795	58.7962		24.2783	27.9117	26.095		36.9954	55.1627	46.0791
37.9038	36.9954	37.4496		32.4536	56.0711	44.2623		31.5452	41.5372	36.5412
46.9874	57.8878	52.4376		38.8121	27.9117	33.3619		42.4456	44.2623	43.354
37.9038	57.8878	47.8958		-0.24764	18.8281	9.29021		48.8042	54.2544	51.5293
				44.2623	49.7125	46.9874		48.8042	46.9874	47.8958
								42.4456	47.8958	45.1707

## Sheet: Survey results 
sequence number	Submission time	length	Data sources	Data sources IP (IP information has been deleted from submission)	1.Your gender is	2.How old are you?	3.Which major are you from?	4.I am familiar with the fundamental steps of the medical history taking process.	5.I believe that obtaining a patient's medical history is essential to clinical reasoning and decision-making in diagnosis and therapy.	6. I believe systematic training can enhance the skill of taking a patient's medical history.	7. I am interested in learning medical history-taking.	8.In the process of obtaining a medical history, I have a firm handle on my ability to think inquiringly.	9.I have a solid understanding of interrogating skills in the context of obtaining a medical history.	10.I have good communication skills in the process of medical history-taking.	11.I have a solid understanding of the humanistic qualities and skills required for taking a medical history.	12. I am satisfied with the current learning method for medical history taking.	13.I think the class hour arrangement of medical history taking is reasonable.	14. I am satisfied with the teachers who teach medical history taking.	15.What are the main ways of learning medical history-taking during your internship?	16.What do you think is the best way to learn medical history-taking?
1	2021/9/18 17:07:00	67s	1		1	23	5	5	5	5	4	4	4	4	4	3	5	5	5	4
2	2021/9/18 17:07:12	64s	1		1	25	5	4	4	5	4	4	4	3	4	3	3	5	2	4
3	2021/9/18 17:07:18	106s	1		1	24	5	4	4	4	4	4	3	3	3	4	3	4	1	4
4	2021/9/18 17:07:36	78s	1		1	22	2	5	4	3	5	3	5	3	4	5	3	3	5	1
5	2021/9/18 17:08:18	121s	1		2	23	5	3	4	4	4	4	2	4	4	3	5	4	5	5
6	2021/9/18 17:08:19	106s	1		2	22	2	5	5	5	4	5	5	4	3	2	4	5	5	3
7	2021/9/18 17:08:39	93s	1		1	21	2	4	5	5	4	4	4	3	3	3	3	4	1	5
8	2021/9/18 17:08:51	171s	1		2	22	2	4	5	4	3	4	3	3	3	3	4	4	5	3
9	2021/9/18 17:08:53	82s	1		1	22	2	4	5	5	3	4	4	4	4	3	4	3	5	3
10	2021/9/18 17:09:04	98s	1		2	21	2	3	5	5	3	3	4	3	3	2	5	5	2	3
11	2021/9/18 17:10:39	150s	1		2	22	2	4	4	5	4	4	4	4	3	2	4	4	5	3
12	2021/9/18 17:11:13	160s	1		2	22	2	3	4	5	4	3	5	4	4	3	4	4	2	1
13	2021/9/18 17:11:23	101s	1		2	22	2	4	4	5	2	3	3	3	3	2	5	5	5	3
14	2021/9/18 17:11:55	152s	1		2	22	2	3	4	5	3	3	3	4	4	3	4	4	5	3
15	2021/9/18 17:13:11	116s	1		1	24	2	5	3	5	3	3	3	4	3	2	4	4	2	3
16	2021/9/18 17:14:35	58s	1		1	22	2	4	4	5	4	4	4	4	4	3	4	4	5	1
17	2021/9/18 17:14:43	125s	1		2	22	2	4	5	4	3	5	3	4	3	2	3	4	5	3
18	2021/9/18 17:16:38	105s	1		1	22	2	3	4	4	3	3	3	3	3	3	4	3	2	3
19	2021/9/18 17:17:44	183s	2		2	22	2	5	4	5	3	4	3	4	3	3	5	4	5	3
20	2021/9/18 17:19:31	121s	1		1	24	5	4	5	5	4	4	3	3	3	3	4	4	5	3
21	2021/9/18 17:23:33	121s	1		1	22	2	4	5	5	5	4	3	4	4	3	4	4	5	4
22	2021/9/18 17:31:07	172s	1		1	22	2	3	5	4	4	3	3	3	3	3	4	4	2	1
23	2021/9/18 17:36:38	107s	1		1	22	2	4	4	4	3	1	3	4	3	3	4	2	5	3
24	2021/9/18 17:45:45	143s	1		2	22	2	5	3	1	5	4	4	5	4	4	5	5	5	5
25	2021/9/18 17:49:54	99s	1		1	22	3	4	4	5	3	3	3	4	3	3	4	4	5	5
26	2021/9/18 17:50:09	112s	1		2	22	3	5	5	4	4	4	3	4	3	3	4	4	1	1
27	2021/9/18 17:50:45	125s	1		2	23	3	2	4	4	3	2	2	2	3	3	2	4	5	5
28	2021/9/18 17:51:09	100s	1		2	22	1	4	4	4	4	4	3	3	3	3	3	4	4	3
29	2021/9/18 17:51:36	161s	1		2	22	3	3	3	5	4	3	2	3	4	3	4	3	5	3
30	2021/9/18 17:53:23	96s	1		2	21	3	4	5	5	4	4	5	4	4	4	4	3	5	3
31	2021/9/18 18:00:16	50s	1		1	23	2	3	4	5	5	4	3	4	3	3	3	4	4	4
32	2021/9/18 18:05:11	163s	1		1	23	2	3	5	4	4	3	3	3	3	3	4	4	5	4
33	2021/9/18 18:05:58	131s	1		1	22	1	3	5	5	5	4	3	4	4	3	4	4	5	4
34	2021/9/18 18:10:12	192s	1		2	22	3	4	4	5	3	3	3	4	3	2	4	4	5	4
35	2021/9/18 18:10:22	106s	1		1	22	1	5	5	5	3	3	4	3	3	3	4	4	5	4
36	2021/9/18 18:15:35	135s	1		1	22	2	4	5	5	4	4	4	4	4	3	5	5	3	3
37	2021/9/18 18:20:30	115s	1		1	24	1	3	5	4	4	3	2	4	4	3	5	4	1	1
38	2021/9/18 19:17:14	111s	1		2	23	3	3	5	5	4	3	3	3	3	3	3	5	4	2
39	2021/9/18 20:08:26	154s	1		2	23	1	5	5	5	3	2	3	3	4	3	4	4	5	4
40	2021/9/19 10:08:24	82s	1		1	22	2	3	4	4	4	3	3	3	4	4	3	4	5	4
41	2021/9/19 12:32:26	76s	1		1	22	2	3	5	5	3	2	2	2	3	2	4	5	4	4
42	2021/9/20 8:40:23	108s	1		2	23	4	5	5	5	5	4	4	4	4	4	4	4	5	4
43	2021/9/21 21:28:40	145s	1		1	22	3	4	5	5	3	3	2	2	3	2	4	4	5	1
44	2021/9/22 17:15:59	107s	1		2	22	3	4	5	4	4	4	4	4	4	3	4	5	1	3
45	2021/9/29 10:48:09	74s	1		1	23	3	4	4	5	4	2	4	4	3	3	4	3	5	5
46	2021/9/29 10:49:37	51s	1		2	22	3	5	3	5	4	5	5	5	3	3	5	3	5	5
47	2021/9/29 10:51:24	98s	1		1	24	1	3	4	4	3	3	3	2	1	2	3	3	5	5
48	2021/9/29 10:51:33	223s	1		1	24	4	4	5	5	4	5	5	4	4	3	4	4	5	3
49	2021/9/29 10:53:15	139s	1		1	25	4	4	4	5	4	3	4	4	4	3	4	4	5	5
50	2021/9/29 10:53:39	93s	1		1	21	2	4	4	5	4	3	3	3	3	3	3	4	4	5
51	2021/9/29 10:54:47	67s	1		2	22	2	5	4	5	4	4	3	3	3	2	4	4	3	3
52	2021/9/29 10:55:31	80s	1		1	22	1	4	5	5	4	4	4	4	4	3	4	4	4	5
53	2021/9/29 10:55:45	123s	1		2	23	2	3	5	4	2	4	4	4	3	3	4	3	5	5
54	2021/9/29 10:55:47	49s	1		2	22	2	3	4	4	3	3	3	3	3	3	3	3	5	4
55	2021/9/29 10:56:13	90s	1		1	22	1	4	3	5	4	4	3	4	3	3	5	4	4	4
56	2021/9/29 10:57:04	100s	1		2	22	2	4	4	5	4	4	4	4	3	2	4	4	3	4
57	2021/9/29 10:57:25	132s	1		1	24	2	5	4	5	2	3	3	5	3	1	5	4	5	4
58	2021/9/29 10:58:41	107s	1		1	23	4	4	5	1	2	4	4	3	2	3	3	3	4	4
59	2021/9/29 10:58:42	72s	1		2	21	1	2	5	4	3	3	2	2	1	2	3	4	4	4
60	2021/9/29 10:58:58	78s	1		2	21	2	3	5	5	4	3	4	4	3	2	4	5	4	4
61	2021/9/29 10:59:30	74s	1		2	22	2	3	3	3	3	3	3	3	3	3	3	3	3	3
62	2021/9/29 10:59:34	122s	1		2	25	4	4	3	5	3	3	4	4	3	3	5	3	5	5
63	2021/9/29 10:59:35	93s	1		2	22	2	4	4	5	4	4	3	5	3	3	5	5	5	5
64	2021/9/29 11:00:09	94s	1		2	22	3	4	4	5	3	4	4	3	3	3	4	3	3	4
65	2021/9/29 11:04:17	108s	1		1	22	2	4	5	5	5	3	3	4	3	3	4	4	5	4
66	2021/9/29 11:05:29	75s	1		1	23	2	3	4	4	4	4	3	3	3	3	3	4	4	4
67	2021/9/29 11:05:40	118s	1		2	22	2	3	4	4	3	3	4	4	3	3	4	4	4	1
68	2021/9/29 11:12:08	59s	1		1	22	2	4	4	4	4	3	3	4	3	3	4	3	4	3
69	2021/9/29 11:14:27	117s	1		2	22	2	4	4	5	3	3	4	5	3	3	5	4	3	3
70	2021/9/29 11:21:50	120s	1		1	22	2	4	5	5	4	4	3	3	3	3	4	4	5	3
71	2021/9/29 11:30:30	51s	1		1	22	2	4	4	4	4	4	4	4	4	4	4	4	4	2
72	2021/9/29 11:31:03	102s	1		1	22	2	3	4	4	3	2	3	3	3	3	3	4	5	5
73	2021/9/29 11:38:02	106s	1		1	23	3	4	4	5	4	4	3	3	3	3	4	4	5	5
74	2021/9/29 11:47:41	75s	1		1	23	2	4	4	4	4	4	4	4	4	3	4	4	4	1
75	2021/9/29 12:09:05	97s	1		1	21	2	3	4	4	4	3	3	3	3	3	4	4	4	4
76	2021/9/29 12:13:04	195s	1		1	22	2	4	5	5	4	3	4	4	3	2	5	4	5	4
77	2021/9/29 12:13:31	363s	1		2	22	2	4	4	4	3	4	4	3	4	2	4	3	3	3
78	2021/9/29 12:45:39	76s	1		1	23	4	5	5	5	5	5	5	5	4	2	5	5	5	4
79	2021/9/29 13:33:31	181s	1		1	26	4	5	4	5	3	5	4	4	3	3	3	3	5	4
80	2021/9/29 14:00:38	106s	1		1	23	1	3	2	5	3	3	2	3	3	1	4	4	4	4
81	2021/9/29 15:49:38	62s	1		2	24	1	3	5	1	4	4	4	2	3	3	3	4	2	4
82	2021/9/29 20:39:03	64s	1		1	22	2	3	4	4	4	4	4	4	4	4	4	3	1	4
83	2021/9/29 21:24:43	65s	1		1	22	2	3	5	5	3	2	3	3	2	2	4	5	3	4
84	2021/9/30 11:12:22	96s	1		1	21	3	4	4	3	4	4	5	3	4	3	5	5	3	1
85	2021/10/8 20:29:17	81s	1		1	22	3	4	4	5	4	4	4	4	4	3	4	4	4	5
86	2021/10/8 20:31:47	54s	1		1	21	3	3	4	1	3	3	3	3	4	3	3	3	3	3
87	2021/10/8 20:33:28	112s	1		1	25	3	4	4	5	3	3	3	3	3	3	3	3	5	5
88	2021/10/8 20:33:42	88s	1		1	22	3	4	5	5	5	4	3	4	4	3	4	5	5	5
89	2021/10/8 20:37:46	202s	1		1	22	3	3	4	5	3	4	3	3	3	3	3	4	4	5
90	2021/10/8 20:44:06	426s	1		2	22	3	4	3	5	4	5	4	3	3	3	3	3	5	5
91	2021/10/8 20:46:31	121s	1		2	22	3	4	4	5	4	3	3	4	3	2	5	4	3	5
92	2021/10/8 20:56:08	72s	1		2	22	3	3	4	5	3	4	4	3	3	2	5	5	3	3
93	2021/10/8 21:28:53	96s	1		1	23	3	4	5	5	4	3	2	3	3	3	4	5	5	2
94	2021/10/8 22:17:27	79s	1		2	22	5	4	5	5	4	4	4	3	4	3	4	4	5	3
95	2021/10/8 22:19:25	82s	1		2	21	3	4	4	5	4	3	3	4	3	2	4	4	5	5
96	2021/10/9 10:24:37	73s	1		2	22	3	5	5	4	4	4	4	4	3	3	4	4	1	1
97	2021/10/9 12:00:13	69s	1		2	23	5	4	4	4	3	3	3	3	3	2	3	3	2	5
98	2021/10/9 12:00:26	85s	1		2	25	4	4	4	5	3	3	4	3	3	2	5	4	4	5
99	2021/10/9 12:01:00	138s	1		2	27	5	4	4	5	4	4	4	4	4	3	4	4	2	2
100	2021/10/9 12:01:06	136s	1		2	23	4	3	5	5	3	3	3	3	3	2	4	4	5	5
101	2021/10/9 12:01:25	150s	1		2	27	5	3	4	4	3	4	1	3	3	3	3	3	5	2
102	2021/10/9 12:07:51	126s	1		2	22	1	5	5	5	3	3	3	3	3	2	3	4	4	5
103	2021/10/9 12:12:23	112s	1		1	23	4	4	4	5	3	4	4	3	3	3	4	4	4	5
104	2021/10/9 12:29:40	72s	1		2	24	5	4	5	4	3	4	4	3	3	3	3	1	5	5
105	2021/10/9 13:18:59	99s	1		2	22	1	4	5	5	4	5	5	3	4	3	4	3	5	5
106	2021/10/9 14:20:57	123s	1		1	23	4	4	4	4	2	4	4	4	2	3	4	4	5	2
107	2021/10/10 10:22:11	108s	1		2	22	4	5	5	4	3	4	4	4	3	3	3	4	4	5
108	2021/10/10 10:39:33	119s	1		2	23	4	3	4	4	4	4	5	3	3	3	4	4	4	5
109	2021/10/12 8:51:16	104s	1		1	22	1	3	4	4	2	3	2	3	3	2	3	3	4	5
Note:	Data sources:1 for wechat,2 for telepone

## Sheet: factor analysis 
Questions	Factor 1	Factor 2	Factor 3
10. I have good communication skills in the process of medical history-taking.	0.763
9.I have a solid understanding of interrogating skills in the context of obtaining a medical history.	0.709
4.I am familiar with the fundamental steps of the medical history taking process.	0.651
8.In the process of obtaining a medical history, I have a firm handle on my ability to think inquiringly.	0.601
11.I have a solid understanding of the humanistic qualities and skills required for taking a medical history.	0.554
6. I believe systematic training can enhance the skill of taking a patient's medical history.		0.703
14. I am satisfied with the teachers who teach medical history taking.		0.605
13.I think the class hour arrangement of medical history taking is reasonable.		0.595
12. I am satisfied with the current learning method for medical history taking.		-0.45
5.I believe that obtaining a patient's medical history is essential to clinical reasoning and decision-making in diagnosis and therapy.			0.725
7. I am interested in learning medical history-taking.			0.58
Key factors	Ability of medical history- taking	Assess-ments of the course	Accptance of medical history- taking
Cumulative variance %	24.91	14.63	12.72

## Sheet: Principal component analysis
Principal component analysis
Cronbach's Alpha	iterms
0.68	11
Varimax Kaiser normalization (KMO = 0.685). Rotation converged in 9 iterations. n = 109.
